# Supplementary material for: Interactions of 1-hydroxypyrene with bovine serum albumin: insights from multi-spectroscopy, docking and molecular dynamics simulation methods
Source: Royal Society of Chemistry journal article supplement (doi:10.1039/c6ra00981f), 2016-01-01
Supplement: c6ra00981f1.pdf [file c6ra00981f1.pdf]

1

## Supporting Information

2 **Interactions of 1-hydroxypyrene with bovine serum albumin: Insights from**  
3 **multi-spectroscopy, docking and molecular dynamics simulation methods**

4 Jing Zhang<sup>a</sup>, Weixiao Chen<sup>a,b</sup>, Bowen Tang<sup>c</sup>, Wei Zhang<sup>a</sup>, Linfeng Chen<sup>a</sup>, Ying  
5 Duan<sup>a</sup>,

6 Yuxiu Zhu<sup>a</sup>, Yaxian Zhu<sup>d</sup>, Yong Zhang<sup>a,e\*</sup>

7

8 <sup>a</sup>State Key Laboratory of Marine Environmental Sciences of China (Xiamen  
9 University), College of Environment and Ecology, Xiamen University, Xiamen  
10 361102, China

11 <sup>b</sup> College of Urban and Environmental Sciences, Peking University, Beijing 100871,  
12 China

13 <sup>c</sup> College of Pharmaceutical Sciences, Xiamen University, Xiamen 361102, China

14 <sup>d</sup> Department of Chemistry, College of Chemistry and Chemical Engineering, Xiamen  
15 University, Xiamen 361005, China

16 <sup>e</sup> Zhangzhou Institute of Technology, Zhangzhou 363000, China

17 \*E-mail address: yzhang:xmu.edu.cn

18

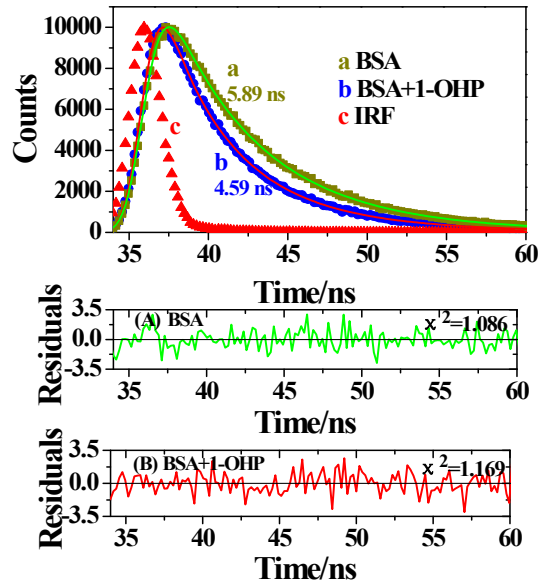

1

2 **Fig. S1.** Fluorescence decay curves of BSA in the absence (a) and presence of 1-OHP

3 (b) and the obtained instrumental response function (IRF) (c). Insets (A) and (B) show

4 a random distribution of the weighted residuals around zero of the two systems.  $C_{I-}$

5

$${}_{OHP} = C_{BSA} = 5.0 \times 10^{-6} \text{ mol L}^{-1}$$

6

### 7 **Calculation of the dynamic and static quenching constant of 1-OHP and BSA**

8 To extract a more quantitative view of the mixed quenching mechanism, the data was

9 analyzed using the Eq. (S1) <sup>1</sup>:

$$10 \quad F_0 / F = (1 + K_D [Q])(1 + K_S [Q]) = K_D K_S [Q]^2 + (K_D + K_S)[Q] + 1 \quad (S1)$$

11  $F_0$  and  $F$  represent the fluorescence intensity in the absence and presence of the

12 quencher (1-OHP in this case), respectively;  $K_S$ ,  $K_D$  are the static and dynamic

13 quenching constants, respectively;  $Q$  is the concentration of the quencher. It's

14 calculated that  $K_D \cdot K_S$  equals  $3.12 \times 10^9$  and  $(K_D + K_S)$  equals  $1.16 \times 10^5$ . Therefore, the

1 possible solutions,  $7.48 \times 10^4$  and  $4.14 \times 10^4$ , are the values of  $K_D$  and  $K_S$ . Additional  
 2 analysis is followed to resolve the definitive value of each. Different from the static  
 3 quenching, where  $\tau_0 / \tau = 1$ . The fluorescence intensity ( $F$ ) and lifetime ( $\tau$ ) in dynamic  
 4 quenching of the protein is described by Eq. (S2) <sup>1,2</sup>:

$$F_0 / F = \tau_0 / \tau = 1 + K_q \tau_0 [Q] = 1 + K_D [Q]$$

(S2)

7 In Eq (S2),  $\tau_0$  is the average lifetime of BSA in the absence of 1-OHP. Quenching  
 8 data of BSA has been fit to the Stern–Volmer plot,  $(\tau_0 / \tau)$  vs.  $C_{1-OHP}$  (see Fig. S2).  
 9 From the slope of the linear function, namely the dynamic quenching constant,  $K_D$ , is  
 10 calculated to be  $4.35 \times 10^4 \text{ L mol}^{-1}$ .  $4.14 \times 10^4$  and  $4.35 \times 10^4 \text{ L mol}^{-1}$  are on the same  
 11 order of magnitude and strikingly similar and as a result,  $K_D$  is determined to be  
 12  $4.14 \times 10^4 \text{ L mol}^{-1}$ , giving  $K_S$  a value of  $7.48 \times 10^4 \text{ L mol}^{-1}$ .

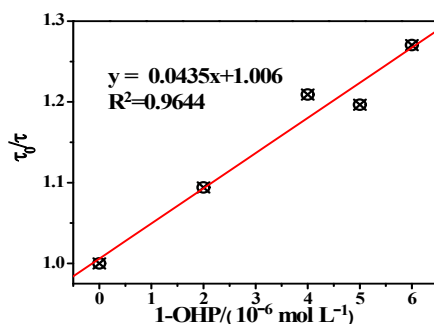

14 **Fig. S2.** Stern–Volmer plot of  $(\tau_0/\tau)$  vs.  $C_{1-OHP}$  in Tris-HCl buffer (pH 7.40).  
 15  $\tau_0$  is the lifetime of BSA without 1-OHP, and  $\tau$  is the lifetime in the presence of 0, 0.2,  
 16 0.4, 0.5,  $0.6 \times 10^{-5} \text{ mol L}^{-1}$  1-OHP,  $C_{BSA} = 5.0 \times 10^{-6} \text{ mol L}^{-1}$ .

1  
2

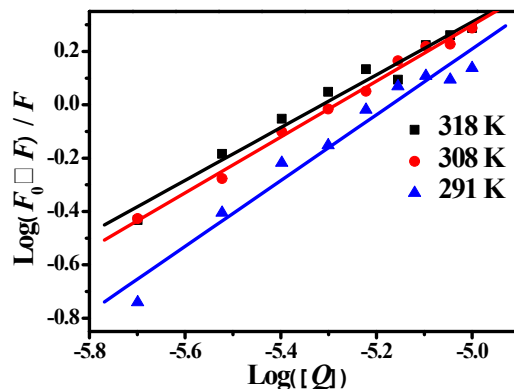

3  
4  
5  
6  
7

**Fig. S3.** The relationship between  $\log (F_0 - F) / F$  and  $\log [Q]$  for BSA-1-OHP

systems at 291, 308 and 318 K:  $C_{\text{BSA}} = 5.0 \times 10^{-6} \text{ mol L}^{-1}$ ,  $C_{1\text{-OHP}} = (0, 0.3, 0.4, 0.5,$

$0.6, 0.7, 0.8, 0.9, 1.0) \times 10^{-5} \text{ mol L}^{-1}$ ,  $\lambda_{\text{em}} = 341 \text{ nm}$

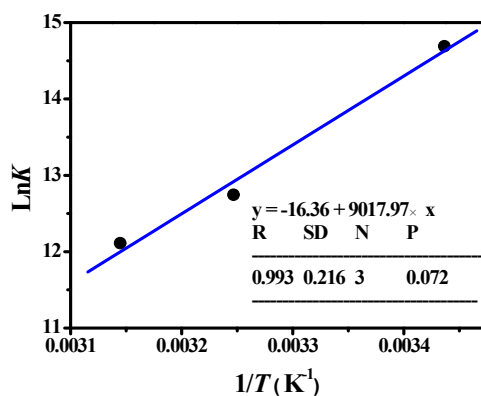

8  
9  
10

**Fig. S4.** Van't Hof plot for the BSA-1-OHP system

11 *Calculation of the Binding distance from BSA to 1-OHP using FERT* The

12 efficiency of energy transfer ( $E$ ) between the donor, Trp residues of BSA and

13 acceptor, 1-OHP can be calculated by applying equation (S3) <sup>3</sup>:

$$E = 1 - \frac{F}{F_0} = \frac{R_0^6}{R_0^6 + r^6} \quad (\text{S3})$$

In the equation (S3),  $F$  and  $F_0$  are the fluorescence intensity of BSA in the presence and absence of 1-OHP.  $r$  is the distance between the donor and acceptor.  $R_0$  is the Förster radius (measured in Å), the critical distance at which the transfer efficiency equals 50%, is given by the following equation:

$$R_0^6 = 8.79 \times 10^{-25} K^2 n^{-4} \phi J \quad (\text{S4})$$

Where  $K$  is the orientation factor related to the geometry of the donor-acceptor dipole,  $n$  is the refractive index of medium,  $\phi$  is the fluorescence quantum yield of the donor, and  $J$  expresses the degree of spectral overlap between the donor emission and the acceptor absorption, in unit of  $\text{L mol}^{-1} \text{cm}^3$ , which is calculated by the following equation:

$$J = \frac{\int_0^\infty F(\lambda) \varepsilon(\lambda) \lambda^4 d\lambda}{\int_0^\infty F(\lambda) d\lambda} \quad (\text{S5})$$

$F(\lambda)$  is the corrected fluorescence intensity of the donor in the wavelength range from  $\lambda$  to  $\lambda + \Delta\lambda$  and  $\varepsilon(\lambda)$  is the molar absorption coefficient of the acceptor at wavelength  $\lambda$ , in unit of  $\text{L mol}^{-1} \text{cm}^{-1}$ .

In our case,  $k^2 = 2/3$ ,  $\phi$  (BSA) = 0.15, and  $n = 1.336$ . At the same concentration of BSA and 1-OHP of  $5 \times 10^{-6} \text{ mol L}^{-1}$ ,  $E$  was determined to be 0.40.

1 The overlap integral,  $J$ , can be evaluated by integrating the spectra in Fig. 6 according  
 2 to Eq. (S5), and was calculated to be  $1.37 \times 10^{-14} \text{ cm}^3 \text{ L mol}^{-1}$ . Fitting the  $J$  and  $E$   
 3 values to Eq. (S3)—(S4), the values of the parameters were listed in Table S1.

4 **Table S1** The calculated parameters of FRET between 1-OHP and BSA;

5  $C_{BSA} = C_{1-OHP} = 5.0 \times 10^{-6} \text{ mol L}^{-1}$

|           | $J (\text{cm}^3 \text{ L mol}^{-1})$ | $E (\%)$ | $R_0 (\text{nm})$ | $r (\text{nm})$ |
|-----------|--------------------------------------|----------|-------------------|-----------------|
| 1-OHP-BSA | $1.37 \times 10^{-14}$               | 40.0     | 2.69              | 2.88            |

6

7 **Interpretations for the colors in the molecular docking results shown in Fig.7 and**

8 **Fig. 9** For the molecular docking results shown in Fig. 7: (A). TRP 134 and TRP 213  
 9 residues are shown as yellow surface; 1-OHP is showed as magenta; BSA is shown as  
 10 cyan; (B). the C atoms, H atom and O atom of 1-OHP are shown as green, red and  
 11 gray, respectively; BSA is shown as chainbows; (C). for amino acid residues, the C  
 12 atoms, H atoms, O atoms, and S atoms are shown as magenta, gray, blue, red and  
 13 orange, respectively; and the C atoms, H atom and O atom of 1-OHP are shown as  
 14 green, red and gray, respectively; BSA is shown as cyan.

15 For the molecular dynamic results shown in Fig. 9: for the amino acid residues within  
 16 a distance of  $5 \text{ \AA}$  approximately 1-OHP, the C atoms, H atoms, O atoms, and S atoms  
 17 are shown as magenta, gray, blue, red and orange, respectively; and the C atoms, H  
 18 atom and O atom of 1-OHP are shown as green, red and gray, respectively.

1

2

3

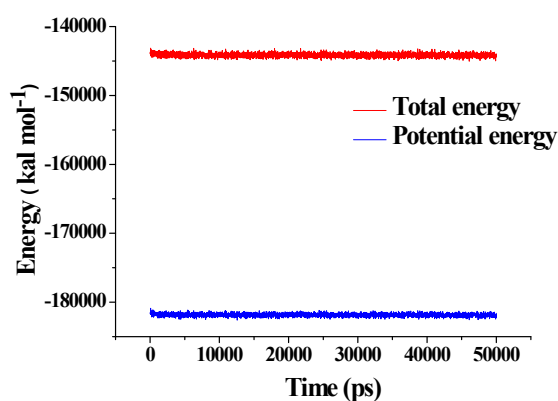

4

5 **Fig. S5.** The potential energy (blue line) and total energy (red line) of the 1-OHP-

6

BSA complex.

7

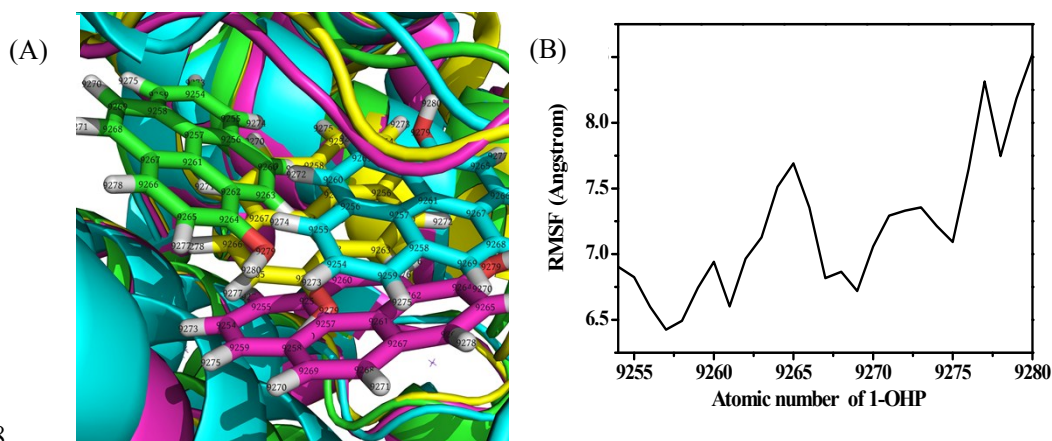

8

9 **Fig. S6.** (a) The overlapping graph of the four snapshots of 1-OHP-BSA complex at

10 15 ns, 25 ns, 30 ns and 40 ns. (b) The average root mean square fluctuation (RMSF)

11 of each atom of 1-OHP during the 2000 frames simulations.

1 a: For the snapshot at 15 ns, 20 ns, 30 ns and 40 ns, BSA is shown as green, cyan, magenta and  
 2 yellow, and the C atoms of 1-OHP are also shown as green, cyan, magenta and yellow,  
 3 respectively; and the O atom and H atom of 1-OHP are all shown as red and gray, respectively.  
 4 For the four snapshots, the atoms of 1-OHP are all labeled as 9294~9280. b: the RMSF values  
 5 represent the position shifts of each atoms of 1-OHP during the 2000 flame simulations, and the  
 6 2000 flames are the sum of every 500 frames before 15 ns, 20 ns, 30 ns and 40 ns.

7

8 **Table S2** Conformational changes of 1-OHP at four snapshots as calculated  
 9 using AmberTools 15

| Time (ns) <sup>a</sup> | RMSD of<br>1-OHP <sup>a,b</sup> (Å) | Angle of –OH group<br>of 1-OHP <sup>a</sup> (°) | Dihedral angle between the –OH group and<br>the four-fused ring group of 1-OHP <sup>a</sup> (°) |
|------------------------|-------------------------------------|-------------------------------------------------|-------------------------------------------------------------------------------------------------|
| 15                     | 10.32                               | 102.12                                          | -170.77                                                                                         |
| 20                     | 13.14                               | 104.74                                          | 102.19                                                                                          |
| 30                     | 0                                   | 110.02                                          | 165.69                                                                                          |
| 40                     | 7.45                                | 104.66                                          | 178.55                                                                                          |

10 a The obtained values are the average values of every 500 frames before 15 ns, 20 ns, 30 ns and 40  
 11 ns, respectively.

12 b The RSMD represents the relative position shifts of 1-OHP at different time, setting the position  
 13 of 1-OHP at 30 ns as a reference. Notably, the RMSD here is calculated as the no-fit RMSD,  
 14 which considers the translations and rotations of 1-OHP.

15

16

17



1

2

3

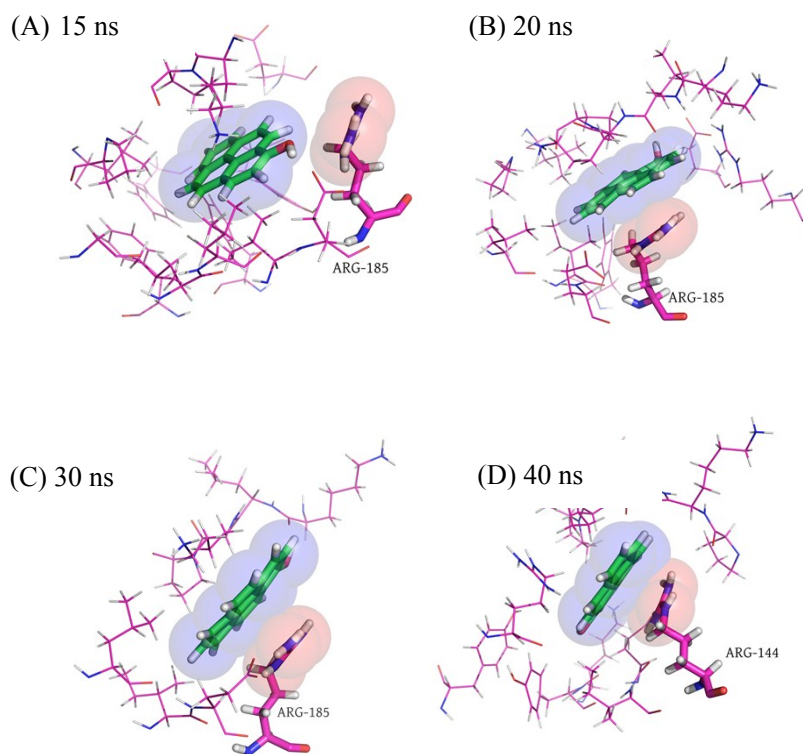

4

5

6

7 **Fig. S7.** Binding modes of 1-OHP with BSA at 15 ns (A), 20 ns (B), 30 ns (C),

8

and 40 ns (D) in the MD simulation

9 The cation- $\pi$  interactions formed between the positively charged nitrogens from the side chain of

10 ARG185 (B,C) or ARG144 (D) and the large  $\pi$ -system from 1-OHP at 20 ns, 30 ns and 40 ns; the

11 electron cloud of 1-OHP and the side chain of ARG185 (A, B, C) or ARG144 (D) are shown as

12 blue sphere and orange sphere, respectively; the amino acid residues within a distance of 5 Å

13 approximately 1-OHP are shown as lines, except for ARG185 (A, B, C) or ARG144 (D) shown as

14 sticks; the color of 1-OHP and the amino acid residues are shown in the same way as Fig. 9

1

2

3

4 **Table S3** The geometry of hydrogen bonds formed between 1-OHP and BSA during  
 5 the simulation process <sup>a</sup>

| Acceptor <sup>b</sup> | Donor H <sup>b</sup> | Donor <sup>b</sup> | Occupancy <sup>c</sup><br>(%) | Averaged<br>Distance<br>(Å) | Averaged<br>Angle (°) |
|-----------------------|----------------------|--------------------|-------------------------------|-----------------------------|-----------------------|
| GLU 182:OE1           | 1-OHP:H10            | 1-OHP:O1           | 34.42                         | 2.63                        | 165.42                |
| GLU 182:OE2           | 1-OHP:H10            | 1-OHP:O1           | 17.24                         | 2.63                        | 165.42                |
| 1-OHP:O1              | TYR 160:HH           | TYR 160:OH         | 2.65                          | 2.81                        | 157.87                |
| GLU 140:OE2           | 1-OHP:H10            | 1-OHP:O1           | 2.49                          | 2.66                        | 163.94                |
| LYS 114:O             | 1-OHP:H10            | 1-OHP:O1           | 1.57                          | 2.73                        | 158.51                |
| LEU 115:O             | 1-OHP:H10            | 1-OHP:O1           | 0.82                          | 2.73                        | 159.18                |
| TYR 160:OH            | 1-OHP:H10            | 1-OHP:O1           | 0.46                          | 2.85                        | 161.84                |
| PRO 117:O             | 1-OHP:H10            | 1-OHP:O1           | 0.31                          | 2.77                        | 157.21                |
| LIG 584:O1            | LYS 116:HZ3          | LYS 116:NZ         | 0.20                          | 2.92                        | 145.78                |
| LIG 584:O1            | LYS 116:HZ1          | LYS 116:NZ         | 0.18                          | 2.91                        | 151.25                |
| LIG 584:O1            | LYS 116:HZ2          | LYS 116:NZ         | 0.15                          | 2.89                        | 155.85                |
| LIG 584:O1            | ARG 185:HH11         | ARG 185:NH1        | 0.13                          | 2.93                        | 161.57                |
| PRO 113:O             | 1-OHP:H10            | 1-OHP:O1           | 0.11                          | 2.76                        | 162.98                |

6 <sup>a</sup> For the hydrogen bonds, the distance between the acceptor and donor heavy atoms is less than

7 3.5 Å. The angles of acceptor and donor diatomic groups are no less than 120°.

8 <sup>b</sup> The first one character of the atom name consists of the chemical symbol for the atom type. All

9 the atom names beginning with “H” are hydrogen atoms; “N” indicates a nitrogen and “O”

10 indicates oxygen. The next character is the remoteness indicator code, which is transliterated

11 according to: “E” stands for (~) “ε”; “Z”~“ζ”; “H”~“η”.

12 <sup>c</sup> The hydrogen bond occupancy is calculated as the ratio of conformations with hydrogen bonds to

1 the total 5000 conformations.

2

3

4

5 **Table S4** Secondary structural alterations of BSA at four snapshots as calculated by

6 AmberTools15 using DSSP method

| Time <sup>a</sup><br>(ns) | Parallel<br>Beta-sheet <sup>b</sup><br>(%) | Anti-parallel<br>Beta-sheet <sup>b</sup><br>(%) | 3-10<br>helix <sup>b</sup><br>(%) | Alpha<br>helix <sup>b</sup><br>(%) | Pi(3-14)<br>helix <sup>b</sup><br>(%) | Turn <sup>b</sup><br>(%) | Bend <sup>b</sup><br>(%) |
|---------------------------|--------------------------------------------|-------------------------------------------------|-----------------------------------|------------------------------------|---------------------------------------|--------------------------|--------------------------|
| 15                        | 0                                          | 0                                               | 2.43                              | 68.69                              | 0.06                                  | 10.25                    | 5.88                     |
| 20                        | 0                                          | 0                                               | 2.31                              | 68.74                              | 0.09                                  | 10.33                    | 5.91                     |
| 30                        | 0                                          | 0                                               | 2.15                              | 68.73                              | 0.12                                  | 10.48                    | 5.99                     |
| 40                        | 0                                          | 0                                               | 2.16                              | 68.58                              | 0.12                                  | 10.60                    | 5.98                     |

7 a The obtained values are the average values of every 500 frames before 15 ns, 20 ns, 30 ns and 40  
8 ns, respectively.

9 b There could be many possible reasons for the slight difference in the secondary structural data  
10 calculated here from that derived from CD experiment: 1) The CD data corresponds to solution  
11 state, whereas the calculated data using X-ray structure corresponds to crystal state, it might  
12 possible that the conformation adopted by our system in solution state is different from the crystal  
13 state; 2) Affects of the CD operating conditions (during the spectral measurements and during  
14 deconvolution ); 3) Affects of the computing methods employed in the theoretical calculation  
15 part, etc.

16

17

18

19

1

2

3

4 **Table S5** Binding free energies (kcal mol<sup>-1</sup>) obtained by the MM-PBAS method

5 in every 5 ns MD simulation

| Time/<br>ns          | $\Delta E_{\text{vdw}}^{\text{a}}$ | $\Delta E_{\text{ele}}^{\text{b}}$ | $\Delta E_{\text{polar}}^{\text{c}}$ | $\Delta E_{\text{nonpolar}}^{\text{d}}$ | $\Sigma E_{\text{nonpolar}}^{\text{e}}$ | $\Sigma E_{\text{polar}}^{\text{f}}$ | $\Delta E_{\text{bind}}^{\text{g}}$ |
|----------------------|------------------------------------|------------------------------------|--------------------------------------|-----------------------------------------|-----------------------------------------|--------------------------------------|-------------------------------------|
| 1~5                  | -24.52                             | -13.53                             | 21.16                                | -2.95                                   | -27.47                                  | 7.63                                 | -15.49                              |
| 5~10                 | -26.05                             | -3.21                              | 14.09                                | -2.92                                   | -28.97                                  | 10.88                                | -13.51                              |
| 10~15                | -21.20                             | -20.34                             | 26.11                                | -2.83                                   | -24.03                                  | 5.77                                 | -16.90                              |
| 15~20                | -22.60                             | -11.04                             | 18.51                                | -2.80                                   | -25.40                                  | 7.47                                 | -15.70                              |
| 20~25                | -23.64                             | -9.35                              | 17.29                                | -2.76                                   | -26.40                                  | 7.94                                 | -16.40                              |
| 25~30                | -22.62                             | -18.67                             | 24.78                                | -2.60                                   | -25.21                                  | 6.11                                 | -18.15                              |
| 30~35                | -23.72                             | -18.83                             | 24.32                                | -2.69                                   | -26.40                                  | 5.48                                 | -19.71                              |
| 35~40                | -25.59                             | -13.53                             | 21.16                                | -2.75                                   | -28.34                                  | 7.63                                 | -14.12                              |
| 40~45                | -22.83                             | -21.15                             | 25.54                                | -2.56                                   | -25.40                                  | 4.38                                 | -21.11                              |
| 45~50                | -22.10                             | -18.02                             | 24.45                                | -2.73                                   | -24.82                                  | 6.43                                 | -16.21                              |
| Average <sup>h</sup> | -23.98±2.46                        | -18.28±10.00                       | 27.66±5.95                           | -2.72±0.17                              | -                                       | -                                    | -17.32±4.23                         |

6 <sup>a</sup> Van der Waals energy, calculated using the MM force field;7 <sup>b</sup> Electrostatic energy, calculated using the MM force field;8 <sup>c</sup> Polar solvation free energy, calculated using the PB equation;9 <sup>d</sup> Nonpolar solvation free energy, calculated using an empirical model;10 <sup>e</sup>  $\Sigma E_{\text{nonpolar}} = \Delta E_{\text{vdw}} + \Delta E_{\text{nonpolar}}$  ;11 <sup>f</sup>  $\Sigma E_{\text{polar}} = \Delta E_{\text{ele}} + \Delta E_{\text{polar}}$ ;12 <sup>g</sup>  $\Delta E_{\text{bind}} = \Delta E_{\text{gas}} + \Delta E_{\text{sol}} = (\Delta E_{\text{vdw}} + \Delta E_{\text{ele}}) + (\Delta E_{\text{polar}} + \Delta E_{\text{nonpolar}})$ ;13 <sup>h</sup>The average values of the decomposition of binding free energies during the 50 ns simulations,

14 calculated using the MM force field.

15

16

17

1  
2  
3  
4  
5

6 **Table S6** The average values of the decomposition of binding free energies (kcal  
7 mol<sup>-1</sup>) of key residues

| Residues | $\Delta E_{\text{vdw}}^{\text{a}}$ | $\Delta E_{\text{ele}}^{\text{b}}$ | $\Delta E_{\text{polar}}^{\text{c}}$ | $\Delta E_{\text{nonpolar}}^{\text{d}}$ | $\Delta E_{\text{bind}}^{\text{e}}$ |
|----------|------------------------------------|------------------------------------|--------------------------------------|-----------------------------------------|-------------------------------------|
| PRO 113  | -0.25                              | -0.02                              | 0.10                                 | 0.00                                    | -0.17                               |
| LYS 114  | -0.46                              | 0.04                               | 0.73                                 | 0.00                                    | 0.31                                |
| LEU 115  | -0.76                              | -0.13                              | 0.92                                 | 0.00                                    | 0.04                                |
| LYS 116  | -2.01                              | -1.48                              | 2.98                                 | 0.00                                    | -0.50                               |
| PRO 117  | -1.60                              | 0.05                               | 0.46                                 | 0.00                                    | -1.09                               |
| PRO 119  | -0.18                              | 0.00                               | 0.10                                 | 0.00                                    | -0.08                               |
| LEU 122  | -0.34                              | -0.04                              | 0.14                                 | 0.00                                    | -0.25                               |
| TYR 137  | -0.27                              | -0.03                              | 0.28                                 | 0.00                                    | -0.01                               |
| GLU 140  | -0.54                              | -0.59                              | 0.79                                 | 0.00                                    | -0.34                               |
| ILE 141  | -0.27                              | 0.01                               | -0.03                                | 0.00                                    | -0.29                               |
| ARG 144  | -0.86                              | -0.38                              | 1.99                                 | 0.00                                    | 0.75                                |
| TYR 160  | -0.26                              | -0.11                              | 0.54                                 | 0.00                                    | 0.17                                |
| LEU 178  | -0.36                              | -0.07                              | 0.14                                 | 0.00                                    | -0.28                               |
| ILE 181  | -0.63                              | 0.12                               | 0.01                                 | 0.00                                    | -0.49                               |
| GLU 182  | -0.14                              | -4.12                              | 4.60                                 | 0.00                                    | 0.34                                |
| ARG 185  | -1.91                              | -0.73                              | 2.22                                 | 0.00                                    | -0.42                               |

8 <sup>a-e</sup> calculated in the same way as illustrated in Table S3

## 9 **References:**

- 10 1. J. R. Lakowicz, *Principles of fluorescence spectroscopy*, Springer Science & Business Media, 2013.  
11 2. B. P. Pahari, S. Chaudhuri, S. Chakraborty and P. K. Sengupta, *J. Phys. Chem. B*, 2014, **119**, 2533-  
12 2545.  
13 3. T. Förster, *Delocalized excitation and excitation transfer*, Florida State University, 1965.  
14 4. H. Xu, Q. Liu and Y. Wen, *Spectrochim. Acta A.*, 2008, **71**, 984-988.  
15
